# Supplementary material
Source: Springer Nature journal article supplement (https://www.springermedizin.de/resource/supplementary/12876_2009_443_MOESM5_ESM.pdf/9437022)

**Wild Type**

**TLR-2<sup>-/-</sup>**

**CD**

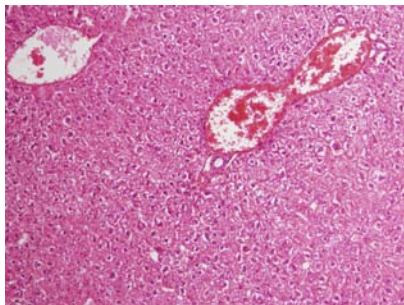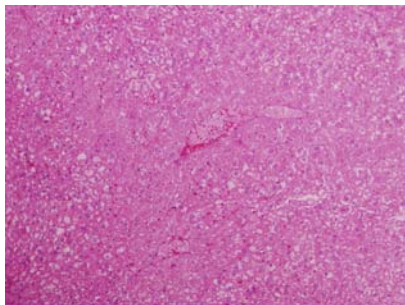

**PUFA**

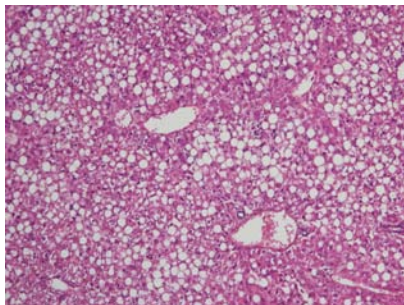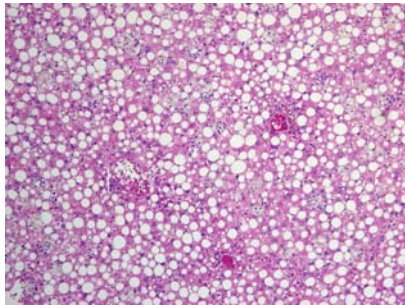

**SAFA**

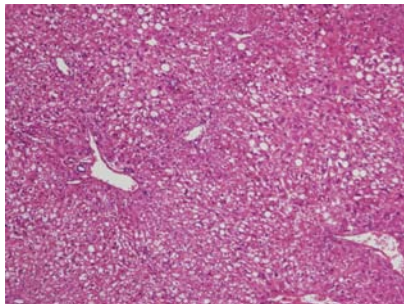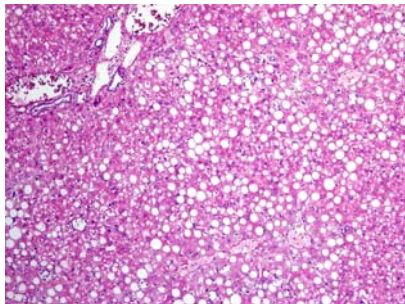

Supplement: MOESM5 [file 9437022]
